# Supplementary material for: 3D-engineering of Cellularized Conduits for Peripheral Nerve Regeneration
Source: PubMed Central journal article supplement (PMC5004136; doi:10.1038/srep32184), 2016-08-30
Supplement: srep32184-s1.pdf [file srep32184-s1.pdf]

### 3D-engineering of Cellularized Conduits for Peripheral Nerve Regeneration

Yu Hu<sup>†,‡,#</sup>, Yao Wu<sup>‡,#</sup>, Zhiyuan Gou<sup>†,#</sup>, Jie Tao<sup>†</sup>, Jiumeng Zhang<sup>†</sup>, Qianqi Liu<sup>†</sup>, Tianyi Kang<sup>†</sup>,

Shu Jiang<sup>‡</sup>, Siqing Huang<sup>‡</sup>, Jiankang He<sup>§</sup>, Shaochen Chen<sup>∇</sup>, Yanan Du<sup>φ</sup>, Maling Gou<sup>\*,†</sup>

<sup>†</sup>State Key Laboratory of Biotherapy and Cancer Center, West China Hospital, Sichuan University, and Collaborative Innovation Center for Biotherapy, Chengdu, Sichuan province, China

<sup>‡</sup>Department of Neurosurgery, West China Hospital, Sichuan University, Chengdu, Sichuan province, China

<sup>§</sup>Xi'an JiaoTong University, School of Mechanical Engineering, Xi'an, Shanxi Province, China

<sup>∇</sup>Department of NanoEngineering, University of California, San Diego, La Jolla, California 92093, USA

<sup>φ</sup> Department of Biomedical Engineering, School of Medicine, Tsinghua University, Beijing 100084, China

\*Corresponding author: Maling Gou; email: [goumaling@scu.edu.cn](mailto:goumaling@scu.edu.cn)

#These authors contributed equally to this work and are co-first authors.

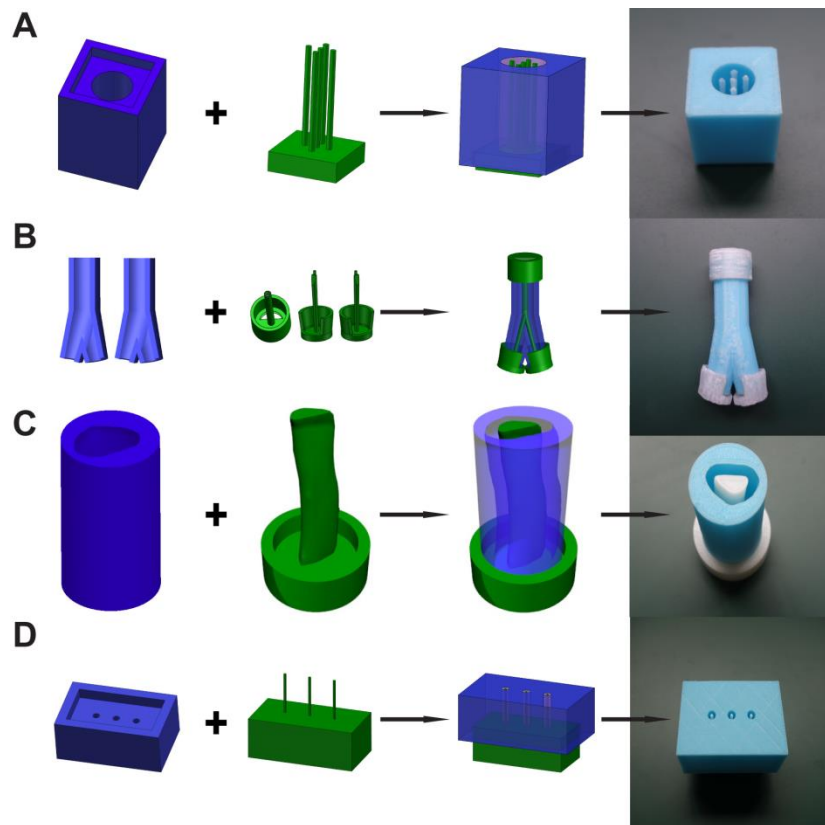

Figure S1. 3D-printed molds used for fabricating multichannel (A), bifurcate (B), patient-specific (C), and cylindrical (D) nerve guidance conduits.

Table S1. Primer sequences used for PCR amplification.

| Genes | Primer sequences                 |
|-------|----------------------------------|
| GAPDH | Forward: CAGAACATCATCCCTGCATC    |
|       | Reverse: ACTCCTCAGCAACTGAGGG     |
| NGF   | Forward: CCAAATCCTTGGATTATCTGCTG |
|       | Reverse: AAGCCTCTACTTATCCACCCAGG |
| BDNF  | Forward: TGGCCTAACAATGTTTGCAGAT  |
|       | Reverse: CCACTCAGAAATTCCTCCTGCT  |
| GDNF  | Forward: TGGGCTATGAAACCAAGGAG    |
|       | Reverse: ATACATCCACACCGTTTAGCG   |
